# Supplementary material for: PEG-fibrin conjugates: the PEG impact on the polymerization dynamics
Source: Royal Society of Chemistry journal article supplement (doi:10.1039/d2sm01504h), 2023-01-01
Supplement: d2sm01504h1.pdf [file d2sm01504h1.pdf]

## PEG-Fibrin conjugates: the PEG impact on the polymerization dynamics

Alesia A. Bakulina<sup>1</sup>, Guzel R. Musina<sup>2</sup>, Arseniy A. Gvdush<sup>2</sup>,  
Yuri M. Efremov<sup>1,2</sup>, Gennady A. Komandin<sup>2</sup>, Massoud Vosough<sup>3</sup>,  
Anastasia I. Shpichka<sup>1,4,5</sup>, Kirill I. Zaytsev<sup>2</sup>, and Peter S. Timashev<sup>1,4,5</sup>

<sup>1</sup>*Institute for Regenerative Medicine, Sechenov University, Moscow, Russia*

<sup>2</sup>*Prokhorov General Physics Institute of the Russian Academy of Sciences, Moscow, Russia*

<sup>3</sup>*Department of Regenerative Medicine, Cell Science Research Center, Royan Institute for Stem Cell Biology and Technology, ACECR, Tehran, Iran*

<sup>4</sup>*World-Class Research Center "Digital Biodesign and Personalized Healthcare", Sechenov University, Moscow, Russia*

<sup>5</sup>*Chemistry Department, Lomonosov Moscow State University, Moscow, Russia*

### Supplementary materials

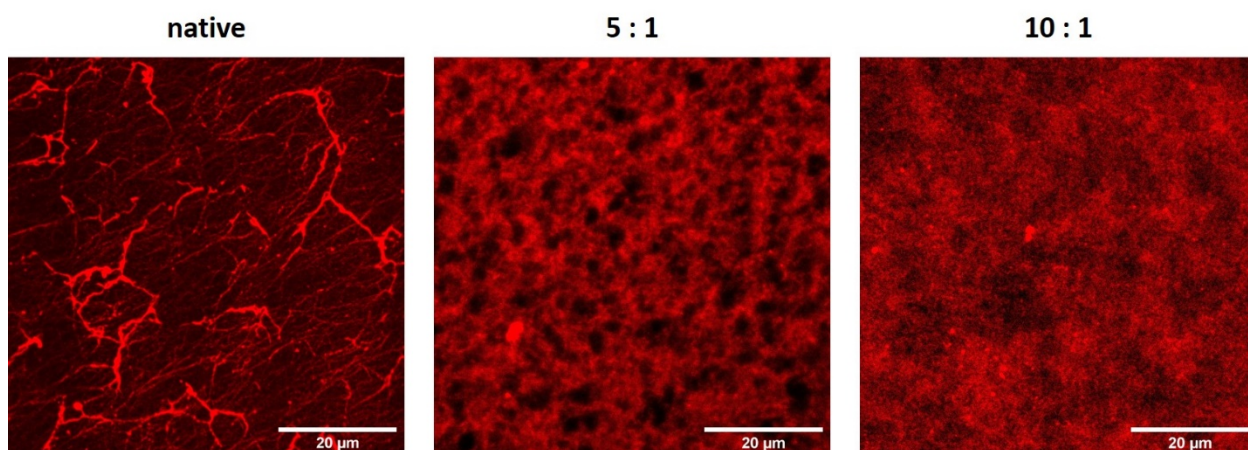

**Fig. S1.** The structure of native fibrin and of the 5:1 and 10:1 PEGylated fibrin gels. Confocal laser scanning microscopy, the scale bar is 20 μm.
